# Supplementary material for: PHOREAU v1.0: a new process-based model to predict forest functioning, from tree ecophysiology to forest dynamics and biogeography
Source: Copernicus journal article supplement (doi:10.5194/gmd-18-7603-2025), 2025-10-22
Supplement: Supplementary file [file gmd-18-7603-2025-supplement-title-page.pdf › gmd-18-7603-2025-supplement-title-page.pdf]

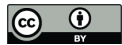

*Supplement of*

## **PHOREAU v1.0: a new process-based model to predict forest functioning, from tree ecophysiology to forest dynamics and biogeography**

**Tanguy Postic et al.**

*Correspondence to:* Tanguy Postic ([tanguy.postic@cefe.cnrs.fr](mailto:tanguy.postic@cefe.cnrs.fr)), Nicolas K. Martin-StPaul ([nicolas.martin@inrae.fr](mailto:nicolas.martin@inrae.fr)), and Xavier Morin ([xavier.morin@cefe.cnrs.fr](mailto:xavier.morin@cefe.cnrs.fr))

- [gmd-18-7603-2025-supplement-title-page.pdf](#)
- [Tables S1-S17.xlsx](#)

The copyright of individual parts of the supplement might differ from the article licence.
